# Supplementary material for: Separation of Isomeric Forms of Urolithin Glucuronides Using Supercritical Fluid Chromatography
Source: PubMed Central journal article supplement (PMC9936581; doi:10.1021/acs.jafc.2c07145), 2023-01-31

## **SUPPORTING INFORMATION**

### **SEPARATION OF ISOMERIC FORMS OF UROLITHIN GLUCURONIDES USING SUPERCRITICAL FLUID CHROMATOGRAPHY**

Ana M. Ares,<sup>1</sup> Laura Toribio,<sup>1</sup> Rocío García-Villalba,<sup>2</sup> Jose M. Villalgordo,<sup>3</sup> Yusuf Althobaiti,<sup>4</sup>  
Francisco A. Tomás-Barberán,<sup>2,4</sup> José Bernal<sup>1\*</sup>

<sup>1</sup> I. U. CINQUIMA, Analytical Chemistry Group (TESEA), Faculty of Sciences, University of Valladolid, 47011, Valladolid, Spain.

<sup>2</sup> CEBAS-CSIC, Research Group on Quality, Safety, and Bioactivity of Plant-Derived Foods. P.O. Box 164, Espinardo, Murcia 30100, Spain

<sup>3</sup> Eurofins-VillaPharma Research S.L.; Parque Tecnológico de Fuente Álamo. E-30320. Fuente Álamo. Murcia. Spain.

<sup>4</sup> Department of Pharmacology and Toxicology, College of Pharmacy, Taif University, P.O. Box 11099, Taif 21944, Saudi Arabia.

\*Corresponding author: Tel# 34-983186347; e-mail: jose.bernal@uva.es

**Table 1S.-** Stationary phases tested for the separation of the urolithin glucuronides studied.

| <b>Column</b>                              | <b>Stationary phase</b>                          | <b>Technical specifications</b> | <b>Manufacturer</b>                           |
|--------------------------------------------|--------------------------------------------------|---------------------------------|-----------------------------------------------|
| <i>Achiral stationary phases</i>           |                                                  |                                 |                                               |
| <b>Silica based stationary phases</b>      |                                                  |                                 |                                               |
| Luna® NH <sub>2</sub>                      | Aminopropyl bonded to silica gel                 | 150 x 4.6 mm; 5 µm              | Phenomenex<br>(Torrance, CA, USA)             |
| Spherex™ Diol                              | Propanediol bonded to silica gel                 | 250 x 4.6 mm; 5 µm              | Phenomenex<br>(Torrance, CA, USA)             |
| Luna® Synergi Hydro                        | C <sub>18</sub> polar endcapped bonded to silica | 150 x 4.6 mm; 5 µm              | Phenomenex<br>(Torrance, CA, USA)             |
| Luna® Omega Polar                          | C <sub>18</sub> polar endcapped bonded to silica | 100 x 2.1 mm; 3 µm              | Phenomenex<br>(Torrance, CA, USA)             |
| Lichrosphere® CN                           | Cyanopropyl bonded to silica gel                 | 150 x 4.6 mm; 5 µm              | Phenomenex<br>(Torrance, CA, USA)             |
| Ultisil™ XB-C <sub>18</sub>                | C <sub>18</sub>                                  | 150 x 4.6 mm; 5 µm              | Welch Materials Inc.<br>(West Haven, CT, USA) |
| Gemini® C <sub>18</sub>                    | C <sub>18</sub> with TMS endcapping              | 150 x 4.6 mm; 5 µm              | Phenomenex<br>(Torrance, CA, USA)             |
| Kinetex® F5                                | Pentafluorophenyl with TMS endcapping            | 150 x 4.6 mm; 5 µm              | Phenomenex<br>(Torrance, CA, USA)             |
| Daicel DCpak® PV4P                         | Polybutylene terephthalate coated on silica gel  | 250 x 4.6 mm; 5 µm              | Daicel<br>(Osaka, Japan)                      |
| Daicel DCpak® PBT                          | Poly(4-vinylpyridine) coated on silica gel       | 250 x 4.6 mm; 5 µm              | Daicel<br>(Osaka, Japan)                      |
| <b>Hydrophilic based stationary phases</b> |                                                  |                                 |                                               |
| Luna® HILIC                                | Dihydroxypropane, unbonded silica                | 50 x 2.0 mm; 3 µm               | Phenomenex<br>(Torrance, CA, USA)             |
| Kinetex® HILIC                             | Unbonded silica                                  | 50 x 2.1 mm; 2.6 µm             | Phenomenex<br>(Torrance, CA, USA)             |

**Table 1.-** Continued.

| <b>Column</b>                          | <b>Stationary phase</b>                                                      | <b>Technical specifications</b> | <b>Manufacturer</b>                           |
|----------------------------------------|------------------------------------------------------------------------------|---------------------------------|-----------------------------------------------|
| <i>Chiral stationary phases</i>        |                                                                              |                                 |                                               |
| <b>Polymer based stationary phases</b> |                                                                              |                                 |                                               |
| Lux® i-Amylose 3                       | Amylose tris(3-chloro-5-methylphenylcarbamate) bonded to silica gel          | 150 x 4.6 mm; 3 µm              | Phenomenex<br>(Torrance, CA, USA)             |
| Regis Reflect® I-Cellulose C           | Cellulose tris(3,5-dichlorophenylcarbamate) bonded to silica gel             | 150 x 4.6 mm; 3 µm              | Regis Technologies<br>(Morton Grove, IL, USA) |
| <b>Others</b>                          |                                                                              |                                 |                                               |
| Regis (S,S) Welk-O® 1 Kromasil         | 1-(3,5-Dinitrobenzamido)-1,2,3,4-tetrahydrophenanthrene bonded to silica gel | 150 x 4.6 mm; 3.5 µm            | Regis Technologies<br>(Morton Grove, IL, USA) |
| Chiralpak® Zwix (+)                    | Quinine -derived (8S, 9R) bonded to silica gel                               | 150 x 3.0 mm; 3 µm              | Daicel<br>(Osaka, Japan)                      |
| Astec Chirobiotic™ T2                  | Macrocyclic glycopeptide antibiotic teicoplanin                              | 250 x 2.1 mm; 5 µm              | Supelco<br>(St. Louis, MO, USA)               |

**Table 2S.-** Separation parameters calculated according to Purnell's formula referred to **Figure 3S**.

| <b>t<sub>0</sub> = 0.76<br/>min</b> |                                | <b>Figure 3S</b>                                  |                                                   |                                                   |                                 |                            |            |
|-------------------------------------|--------------------------------|---------------------------------------------------|---------------------------------------------------|---------------------------------------------------|---------------------------------|----------------------------|------------|
| <b>Compound</b>                     | <b>t<sub>r</sub> /<br/>min</b> | <b>Rs<sub>1-2</sub><br/>(<math>\alpha</math>)</b> | <b>Rs<sub>2-3</sub><br/>(<math>\alpha</math>)</b> | <b>Rs<sub>3-4</sub><br/>(<math>\alpha</math>)</b> | <b>Retention<br/>factor (k)</b> | <b>Symmetry<br/>Factor</b> | <b>NTP</b> |
| <b>1</b>                            | 4.20                           | 1.00                                              |                                                   |                                                   | 4.53                            | 2.92                       | 1672       |
| <b>2</b>                            | 4.68                           | (1.14)                                            | 0.86                                              |                                                   | 5.16                            | 2.47                       | 1548       |
| <b>3</b>                            | 5.16                           |                                                   | (1.12)                                            | 0.13                                              | 5.79                            | 3.31                       | 1370       |
| <b>4</b>                            | 5.23                           |                                                   |                                                   | (1.02)                                            | 5.88                            | 3.23                       | 1500       |

**NTP:** number of theoretical plates.

**Table 3S.-** Separation parameters calculated according to Purnell's formula referred to **Figure 4S**.

| $t_0 = 0.76$<br>min | Figure 4S      |                            |                            |                            |                         |                    |      |
|---------------------|----------------|----------------------------|----------------------------|----------------------------|-------------------------|--------------------|------|
| Compound            | $t_r$ /<br>min | $Rs_{1-2}$<br>( $\alpha$ ) | $Rs_{2-3}$<br>( $\alpha$ ) | $Rs_{3-4}$<br>( $\alpha$ ) | Retention<br>factor (k) | Symmetry<br>Factor | NTP  |
| 1                   | 3.68           | 0.98                       | 0.84                       | 2.53                       | 3.84                    | 1.13               | 6060 |
| 2                   | 3.86           | (1.06)                     |                            |                            | 4.08                    | 1.14               | 7124 |
| 3                   | 4.02           | 0.98                       | (1.05)                     | (1.18)                     | 4.29                    | 1.16               | 7074 |
| 4                   | 4.62           |                            | 5.08                       |                            | 1.13                    | 6060               |      |

NTP: number of theoretical plates.

**Table 4S.-** Separation parameters calculated according to Purnell's formula referred to **Figure 5S**.

| $t_0 = 0.76$<br>min | Figure 5S      |                               |                               |                               |                         |                    |      |
|---------------------|----------------|-------------------------------|-------------------------------|-------------------------------|-------------------------|--------------------|------|
| Compound            | $t_r$ /<br>min | $R_{s_{1-2}}$<br>( $\alpha$ ) | $R_{s_{2-3}}$<br>( $\alpha$ ) | $R_{s_{3-4}}$<br>( $\alpha$ ) | Retention<br>factor (k) | Symmetry<br>Factor | NTP  |
| 1                   | 3.88           | 0.71                          |                               |                               | 4.11                    | 1.24               | 5005 |
| 2                   | 4.03           | (1.05)                        | 1.60                          |                               | 4.30                    | 1.31               | 5838 |
| 3                   | 4.38           |                               | (1.11)                        | 2.31                          | 4.75                    | 1.23               | 6416 |
| 4                   | 4.98           |                               |                               | (1.17)                        | 5.55                    | 1.28               | 5883 |

NTP: number of theoretical plates.

**Table 5S.-** Separation parameters calculated according to Purnell's formula referred to **Figure 6S**.

| $t_0 = 0.76$<br>min | Figure 6S      |                               |                               |                               |                         |                    |      |
|---------------------|----------------|-------------------------------|-------------------------------|-------------------------------|-------------------------|--------------------|------|
| Compound            | $t_r$ /<br>min | $R_{s_{1-2}}$<br>( $\alpha$ ) | $R_{s_{2-3}}$<br>( $\alpha$ ) | $R_{s_{3-4}}$<br>( $\alpha$ ) | Retention<br>factor (k) | Symmetry<br>Factor | NTP  |
| 1                   | 4.78           | 0.85                          |                               |                               | 5.29                    | 1.37               | 4413 |
| 2                   | 5.07           | (1.07)                        | 0.92                          |                               | 5.67                    | 1.73               | 3491 |
| 3                   | 5.34           |                               | (1.06)                        | 4.70                          | 6.03                    | 1.31               | 5259 |
| 4                   | 7.52           |                               |                               | (1.48)                        | 8.89                    | 1.79               | 4207 |

NTP: number of theoretical plates.

**Table 6S.-** Effect of temperature on the separation of the pairs of isomers with the (S, S) Welk-O<sup>®</sup> 1 column. Chromatographic conditions: mobile phase composed of CO<sub>2</sub> and 0.1% of trifluoroacetic acid in isopropanol (65:35, v/v) applied in isocratic mode at a flow rate of 2.0 mL/min and 120 bar.

| Compounds | uro-A glucuronides |                |                | iso-uro-A glucuronides |                |                |
|-----------|--------------------|----------------|----------------|------------------------|----------------|----------------|
|           | Temperature (°C)   | k <sub>1</sub> | k <sub>2</sub> | Rs                     | k <sub>1</sub> | k <sub>2</sub> |
| 20        | 5.11               | 5.47           | 0.84           | 5.58                   | 8.21           | 5.05           |
| 25        | 5.29               | 5.67           | 0.85           | 6.03                   | 8.89           | 5.19           |
| 30        | 5.34               | 5.75           | 0.89           | 6.24                   | 9.26           | 5.21           |
| 35        | 5.57               | 6.04           | 0.99           | 6.95                   | 10.32          | 5.34           |



**Table 7S.-** Thermodynamic parameters and isoelution temperatures ( $T_{\text{iso}}$ ) for the pairs of isomers with the (S, S) Whelk-O<sup>®</sup> 1 column. Chromatographic conditions: mobile phase composed of CO<sub>2</sub> and 0.1% of trifluoroacetic acid in isopropanol (65:35, v/v) applied in isocratic mode at a flow rate of 2.0 mL/min and 120 bar.

| <b>Compounds</b>              | $\Delta H_1$<br>(cal/mol) | $\Delta H_2$<br>(cal/mol) | $\Delta S_1$<br>(cal/mol K) | $\Delta S_2$<br>(cal/mol K) | $T_{\text{iso}}$<br>(°C) |
|-------------------------------|---------------------------|---------------------------|-----------------------------|-----------------------------|--------------------------|
| <b>uro-A glucuronides</b>     | 964.1                     | 1106.2                    | 6.5                         | 7.2                         | -43                      |
| <b>iso-uro-A glucuronides</b> | 2479.4                    | 2597.9                    | 11.9                        | 13.1                        | -172                     |

**Table 8S.-** Separation parameters calculated according to Purnell's formula referred to **Figure 8S**.

| <b>t<sub>0</sub> = 0.76<br/>min</b> |                                | <b>Figure 8S</b>                                  |                                                   |                                                   |                                 |                            |            |
|-------------------------------------|--------------------------------|---------------------------------------------------|---------------------------------------------------|---------------------------------------------------|---------------------------------|----------------------------|------------|
| <b>Compound</b>                     | <b>t<sub>r</sub> /<br/>min</b> | <b>Rs<sub>1-2</sub><br/>(<math>\alpha</math>)</b> | <b>Rs<sub>2-3</sub><br/>(<math>\alpha</math>)</b> | <b>Rs<sub>3-4</sub><br/>(<math>\alpha</math>)</b> | <b>Retention<br/>factor (k)</b> | <b>Symmetry<br/>Factor</b> | <b>NTP</b> |
| <b>1</b>                            | 6.43                           | 1.40                                              |                                                   |                                                   | 7.46                            | 1.19                       | 2886       |
| <b>2</b>                            | 7.15                           | (1.13)                                            | 1.81                                              |                                                   | 8.41                            | 1.22                       | 3085       |
| <b>3</b>                            | 8.05                           |                                                   | (1.13)                                            | 4.62                                              | 9.54                            | 1.35                       | 4691       |
| <b>4</b>                            | 10.80                          |                                                   |                                                   | (1.38)                                            | 13.21                           | 1.45                       | 5134       |

**NTP:** number of theoretical plates.

**Table 9S.-** Separation parameters calculated according to Purnell's formula referred to **Figure**

2.

| $t_0 = 0.76$<br>min | Figure 2       |                            |                            |                            |                            |                         |                    |      |
|---------------------|----------------|----------------------------|----------------------------|----------------------------|----------------------------|-------------------------|--------------------|------|
| Compound            | $t_r$ /<br>min | $Rs_{1-2}$<br>( $\alpha$ ) | $Rs_{2-3}$<br>( $\alpha$ ) | $Rs_{3-4}$<br>( $\alpha$ ) | $Rs_{4-5}$<br>( $\alpha$ ) | Retention<br>factor (k) | Symmetry<br>Factor | NTP  |
| 1                   | 6.30           | 1.20                       |                            |                            |                            | 7.59                    | 1.24               | 2505 |
| 2                   | 7.22           | (1.12)                     | 1.57                       |                            |                            | 8.50                    | 1.20               | 2143 |
| 3                   | 8.18           |                            | (1.15)                     | 2.01                       |                            | 9.76                    | 1.30               | 2998 |
| 4                   | 9.37           |                            |                            | (1.16)                     | 2.25                       | 11.33                   | 1.51               | 3966 |
| 5                   | 10.93          |                            |                            |                            | (1.18)                     | 13.38                   | 1.40               | 2998 |

NTP: number of theoretical plates.

**Table 10S.-** Separation parameters calculated according to Purnell's formula referred to **Figure 9S.**

| t <sub>0</sub> = 0.91 min |                      | Figure 9S-A             |                         |                         |                      |                 |      |
|---------------------------|----------------------|-------------------------|-------------------------|-------------------------|----------------------|-----------------|------|
| Compound                  | t <sub>r</sub> / min | Rs <sub>1,2-3</sub> (α) | Rs <sub>3-4</sub> (α)   | Rs <sub>4-5</sub> (α)   | Retention factor (k) | Symmetry Factor | NTP  |
| 1                         | 3.51                 | 2.29                    | 1.43<br>(2.64)          | 2.65<br>(1.33)          | 2.86                 | 1.27            | 1045 |
| 2                         | 4.5                  | (1.38)                  |                         |                         | 3.95                 | 1.35            | 1728 |
| 3                         | 5.24                 | 2.29<br>(1.38)          | 1.43<br>(2.64)          | 2.65<br>(1.33)          | 4.76                 | 1.55            | 1639 |
| 4                         | 6.66                 |                         |                         |                         | 6.32                 | 1.62            | 2469 |
| t <sub>0</sub> = 0.91 min |                      | Figure 9S-B             |                         |                         |                      |                 |      |
| Compound                  | t <sub>r</sub> / min | Rs <sub>1,2-3</sub> (α) | Rs <sub>3-4</sub> (α)   | Rs <sub>4-5</sub> (α)   | Retention factor (k) | Symmetry Factor | NTP  |
| 1                         | 4.13                 | 2.13                    | 0.52<br>(1.08)          | 3.56<br>(1.49)          | 3.54                 | 1.91            | 1034 |
| 2                         | 5.62                 | (1.46)                  |                         |                         | 5.18                 | -               | -    |
| 3                         | 6.01                 | 2.13<br>(1.46)          | 0.52<br>(1.08)          | 3.56<br>(1.49)          | 5.60                 | -               | -    |
| 4                         | 8.53                 |                         |                         |                         | 8.37                 | 1.47            | 2318 |
| t <sub>0</sub> = 0.91 min |                      | Figure 9S-C             |                         |                         |                      |                 |      |
| Compound                  | t <sub>r</sub> / min | Rs <sub>1-2</sub> (α)   | Rs <sub>2-3,4</sub> (α) | Rs <sub>3,4-5</sub> (α) | Retention factor (k) | Symmetry Factor | NTP  |
| 1                         | 10.58                | 0.92                    | 0.89<br>(1.12)          | 5.15<br>(1.49)          | 10.63                | -               | -    |
| 2                         | 11.73                | (1.12)                  |                         |                         | 11.89                | -               | 1430 |
| 3                         | 13.07                | 0.92<br>(1.12)          | 0.89<br>(1.12)          | 5.15<br>(1.49)          | 13.36                | -               | 1212 |
| 4                         | 19.08                |                         |                         |                         | 19.97                | 1.33            | 4276 |

NTP: number of theoretical plates.

**Table 11S.-** Separation parameters calculated according to Purnell's formula referred to **Figure 10S.**

| t <sub>0</sub> = 0.91 min |                     | Figure 10S-A            |                       |                                  |                      |                 |       |
|---------------------------|---------------------|-------------------------|-----------------------|----------------------------------|----------------------|-----------------|-------|
| Compound                  | t <sub>r</sub> /min | Rs <sub>1,2-3</sub> (α) | Rs <sub>3-4</sub> (α) | Rs <sub>4-5</sub> (α)            | Retention factor (k) | Symmetry Factor | NTP   |
| 1                         | 6.26                | 0.99                    | 0.80<br>(1.20)        | 1.87<br>(1.30)                   | 5.88                 | -               | 286   |
| 2                         | 7.60                | (1.25)                  |                       |                                  | 7.35                 | -               | 500   |
| 3                         | 8.96                |                         |                       |                                  | 8.85                 | -               | 441   |
| 4                         | 11.35               |                         |                       |                                  | 11.47                | -               | 1250  |
| t <sub>0</sub> = 0.91 min |                     | Figure 10S-B            |                       |                                  |                      |                 |       |
| Compound                  | t <sub>r</sub> /min | Rs <sub>1,2-3</sub> (α) | Rs <sub>3-4</sub> (α) | Rs <sub>4-5</sub> (α)            | Retention factor (k) | Symmetry Factor | NTP   |
| 1                         | 7.13                | 0.90                    | 0.70<br>(1.18)        | 1.23<br>(1.27)                   | 6.84                 | -               | 368   |
| 2                         | 8.65                | (1.24)                  |                       |                                  | 8.51                 | -               | 419   |
| 3                         | 10.08               |                         |                       |                                  | 10.08                | -               | 385   |
| 4                         | 12.55               |                         |                       |                                  | 12.79                | 5.64            | 690   |
| t <sub>0</sub> = 0.91 min |                     | Figure 10S-C            |                       |                                  |                      |                 |       |
| Compound                  | t <sub>r</sub> /min | Rs <sub>1,2</sub> (α)   | Rs <sub>2-3</sub> (α) | Rs <sub>3-4</sub> (α)            | Retention factor (k) | Symmetry Factor | NTP   |
| 1                         | 9.19                | 2.91                    | 0.42<br>(1.08)        | 1.14<br>(1.24;<br>2.74<br>(1.41) | 9.10                 | -               | 924   |
| 2                         | 9.93                | (1.09)                  |                       |                                  | 9.91                 | -               | 24335 |
| 3                         | 10.68               |                         |                       |                                  | 10.74                | -               | 575   |
| 4                         | 12.98               |                         |                       |                                  | 13.26                | 1.82            | 659   |
| 5                         | 17.89               |                         |                       | 18.66                            | 2.75                 | 1597            |       |
| t <sub>0</sub> = 0.91 min |                     | Figure 10S-D            |                       |                                  |                      |                 |       |
| Compound                  | t <sub>r</sub> /min | Rs <sub>1,2-3</sub> (α) | Rs <sub>3-4</sub> (α) | Rs <sub>4-5</sub> (α)            | Retention factor (k) | Symmetry Factor | NTP   |
| 1                         | 3.51                | 2.28                    | 1.43<br>(1.21)        | 2.66<br>(1.33)                   | 2.86                 | 1.27            | 1045  |
| 2                         | 4.50                | (1.38)                  |                       |                                  | 3.95                 | 1.35            | 1728  |
| 3                         | 5.24                |                         |                       |                                  | 4.76                 | 1.55            | 1639  |
| 4                         | 6.67                |                         |                       |                                  | 6.33                 | 1.62            | 2469  |

NTP: number of theoretical plates.

**Table 12S.-** Separation parameters calculated according to Purnell's formula referred to **Figure 11S.**

| <b>t0 = 0.91 min</b> |                            | <b>Figure 11S-A</b>           |                             |                             |                             |                        |            |
|----------------------|----------------------------|-------------------------------|-----------------------------|-----------------------------|-----------------------------|------------------------|------------|
| <b>Compound</b>      | <b>t<sub>r</sub> / min</b> | <b>Rs<sub>1,2-3</sub> (α)</b> | <b>Rs<sub>3-4</sub> (α)</b> | <b>Rs<sub>4-5</sub> (α)</b> | <b>Retention factor (k)</b> | <b>Symmetry Factor</b> | <b>NTP</b> |
| 1                    | 6.26                       | 0.99                          | 0.80<br>(1.20)              | 1.86<br>(1.30)              | 5.88                        | -                      | 286        |
| 2                    | 7.60                       | (1.25)                        |                             |                             | 7.35                        | -                      | 500        |
| 3                    | 8.96                       |                               |                             |                             | 8.85                        | -                      | 441        |
| 4                    | 11.35                      |                               |                             |                             | 11.47                       | -                      | 1250       |
| <b>t0 = 0.91 min</b> |                            | <b>Figure 11S-B</b>           |                             |                             |                             |                        |            |
| <b>Compound</b>      | <b>t<sub>r</sub> / min</b> | <b>Rs<sub>1,2-3</sub> (α)</b> | <b>Rs<sub>3-4</sub> (α)</b> | <b>Rs<sub>4-5</sub> (α)</b> | <b>Retention factor (k)</b> | <b>Symmetry Factor</b> | <b>NTP</b> |
| 1                    | 9.41                       | 1.31                          | 1.63<br>(1.20)              | 3.00<br>(1.32)              | 9.34                        | 0.86                   | 271        |
| 2                    | 10.88                      | (1.17)                        |                             |                             | 10.96                       | 2.19                   | 1492       |
| 3                    | 12.87                      |                               |                             |                             | 13.14                       | 1.57                   | 1771       |
| 4                    | 16.64                      |                               |                             |                             | 17.29                       | 1.71                   | 2803       |
| <b>t0 = 0.91 min</b> |                            | <b>Figure 11S-C</b>           |                             |                             |                             |                        |            |
| <b>Compound</b>      | <b>t<sub>r</sub> / min</b> | <b>Rs<sub>1,2-3</sub> (α)</b> | <b>Rs<sub>3-4</sub> (α)</b> | <b>Rs<sub>4-5</sub> (α)</b> | <b>Retention factor (k)</b> | <b>Symmetry Factor</b> | <b>NTP</b> |
| 1                    | 14.68                      | 1.61                          | 2.20<br>(1.19)              | 3.76<br>(1.28)              | 15.13                       | 2.08                   | 911        |
| 2                    | 17.16                      | (1.18)                        |                             |                             | 17.86                       | 1.44                   | 1989       |
| 3                    | 20.25                      |                               |                             |                             | 21.25                       | 1.78                   | 3310       |
| 4                    | 25.66                      |                               |                             |                             | 27.20                       | 1.78                   | 5083       |
| <b>t0 = 0.91 min</b> |                            | <b>Figure 11S-D</b>           |                             |                             |                             |                        |            |
| <b>Compound</b>      | <b>t<sub>r</sub> / min</b> | <b>Rs<sub>1,2-3</sub> (α)</b> | <b>Rs<sub>3-4</sub> (α)</b> | <b>Rs<sub>4-5</sub> (α)</b> | <b>Retention factor (k)</b> | <b>Symmetry Factor</b> | <b>NTP</b> |
| 1                    | 10.58                      | 2.61                          | 1.14<br>(1.12)              | 3.04<br>(1.27)              | 10.63                       | 2.07                   | 1020       |
| 2                    | 13.96                      | (1.35)                        |                             |                             | 14.34                       | -                      | 1852       |
| 3                    | 15.50                      |                               |                             |                             | 16.03                       | -                      | 2118       |
| 4                    | 19.37                      |                               |                             |                             | 20.29                       | 2.15                   | 3701       |

**NTP:** number of theoretical plates.

## Figure Captions

**Figure 1S.-** UV-Vis spectra of the urolithin glucuronides.

**Figure 2S.-** Representative SFC-UV chromatograms obtained from a mixture of urolithin glucuronide standards with different columns: **A)** Lichrosphere® CN; **B)** Daicel DCpak® PBT; **C)** Spherex™ Diol; **D)** Luna® HILIC.

**Figure 3S.-** Representative SFC-UV chromatograms obtained from a mixture of four urolithin glucuronide standards (100 mg/L; 1.- urolithin A 8-glucuronide; 2.- urolithin A 3-glucuronide 3.- isourolithin A 9- glucuronide; 4.- isourolithin A 3-glucuronide) using the Regis (S,S) Welk-O® 1 Kromasil column and the initial conditions (see *Optimization of the separation conditions* subsection).

**Figure 4S.-** Representative SFC-UV chromatograms obtained from a mixture of four urolithin glucuronide standards (100 mg/L; 1.- urolithin A 8-glucuronide; 2.- urolithin A 3-glucuronide 3.- isourolithin A 9- glucuronide; 4.- isourolithin A 3-glucuronide) using the Regis (S,S) Welk-O® 1 Kromasil column and 0.1% (v/v) trifluoroacetic acid in methanol as organic modifier (see *Optimization of the separation conditions* subsection).

**Figure 5S.-** Representative SFC-UV chromatograms obtained from a mixture of four urolithin glucuronide standards (100 mg/L; 1.- urolithin A 8-glucuronide; 2.- urolithin A 3-glucuronide 3.- isourolithin A 9- glucuronide; 4.- isourolithin A 3-glucuronide) using the Regis (S,S) Welk-O® 1 Kromasil column and 0.1% (v/v) trifluoroacetic acid in ethanol as organic modifier (see *Optimization of the separation conditions* subsection).

**Figure 6S.-** Representative SFC-UV chromatograms obtained from a mixture of four urolithin glucuronide standards (100 mg/L; 1.- urolithin A 3-glucuronide; 2.- urolithin A 8-glucuronide 3.- isourolithin A 9- glucuronide; 4.- isourolithin A 3-glucuronide) using the Regis (S,S) Welk-O® 1 Kromasil column and 0.1% (v/v) trifluoroacetic acid in isopropanol as organic modifier (see *Optimization of the separation conditions* subsection).

**Figure 7S.-** Representative SFC-UV chromatograms obtained from a mixture of four urolithin glucuronide standards (100 mg/L; isourolithin A 9- glucuronide) using the Regis (S,S) Welk-O<sup>®</sup> 1 Kromasil column and 0.1% (v/v) trifluoroacetic acid in acetonitrile as organic modifier (see *Optimization of the separation conditions* subsection).

**Figure 8S.-** Representative SFC-UV chromatograms obtained from a mixture of four urolithin glucuronide standards (100 mg/L; 1.- urolithin A 3-glucuronide; 2.- urolithin A 8-glucuronide 3.- isourolithin A 9- glucuronide; 4.- isourolithin A 3-glucuronide) using the Regis (S,S) Welk-O<sup>®</sup> 1 Kromasil column and 0.1% (v/v) trifluoroacetic acid in isopropanol as organic modifier with the selected conditions (see *Optimization of the separation conditions* subsection).

**Figure 9S.-** Representative SFC-UV chromatograms obtained from a mixture of five urolithin glucuronide standards (100 mg/L; 1.- isourolithin A 9- glucuronide; 2.- isourolithin A 3- glucuronide; 3.- urolithin A 8-glucuronide; 4.- urolithin A 3-glucuronide; 5.- urolithin B 3- glucuronide) using the Reflect<sup>™</sup> I-Cellulose C column and 0.1% (v/v) trifluoroacetic acid in different organic solvents: **A)** methanol; **B)** ethanol; **C)** isopropanol (see *Optimization of the separation conditions* subsection).

**Figure 10S.-** Representative SFC-UV chromatograms obtained from a mixture of five urolithin glucuronide standards (100 mg/L; 1.- isourolithin A 9- glucuronide; 2.- isourolithin A 3- glucuronide; 3.- urolithin A 8-glucuronide; 4.- urolithin A 3-glucuronide; 5.- urolithin B 3- glucuronide) using the Reflect<sup>™</sup> I-Cellulose C column and different acid additives 0.1% (v/v; **A)** no additive; **B)** formic acid; **C)** acetic acid; **D)** trifluoroacetic acid in methanol (see *Optimization of the separation conditions* subsection).

**Figure 11S.-** Representative SFC-UV chromatograms obtained from a mixture of five urolithin glucuronide standards (100 mg/L; 1.- isourolithin A 9- glucuronide; 2.- isourolithin A 3- glucuronide; 3.- urolithin A 8-glucuronide; 4.- urolithin A 3-glucuronide; 5.- urolithin B 3- glucuronide) using the Reflect<sup>™</sup> I-Cellulose C column and different basic additives 0.1% (v/v;



A) no additive; **B)** diethylamine; **C)** trimethylamine; **D)** ethanolamine) in methanol (see *Optimization of the separation conditions* subsection).

**Figure 1S**

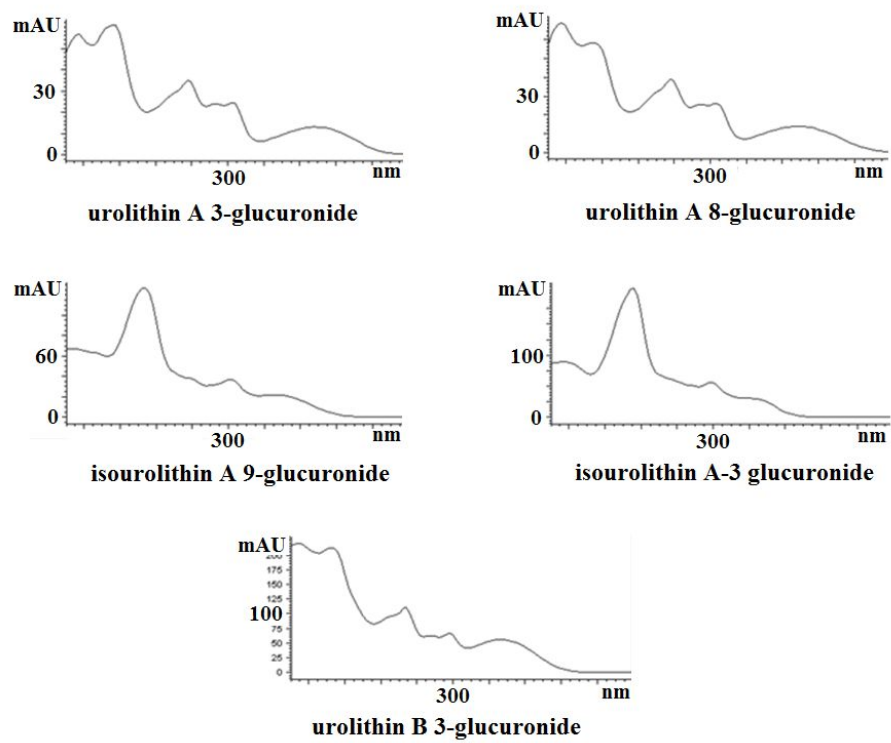

**Figure 2S**

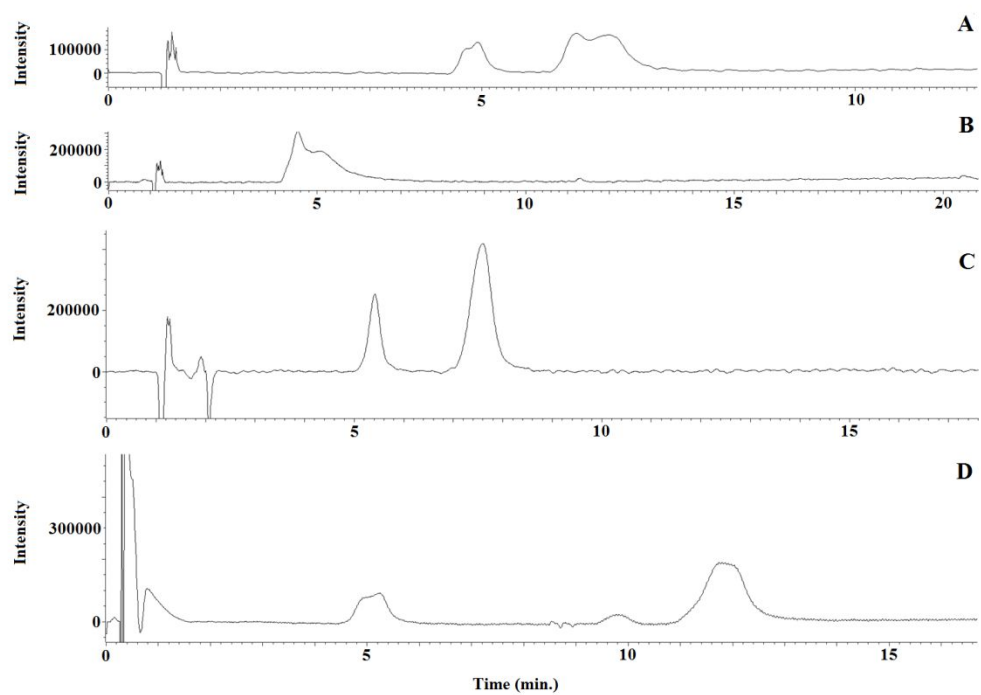

Figure 3S

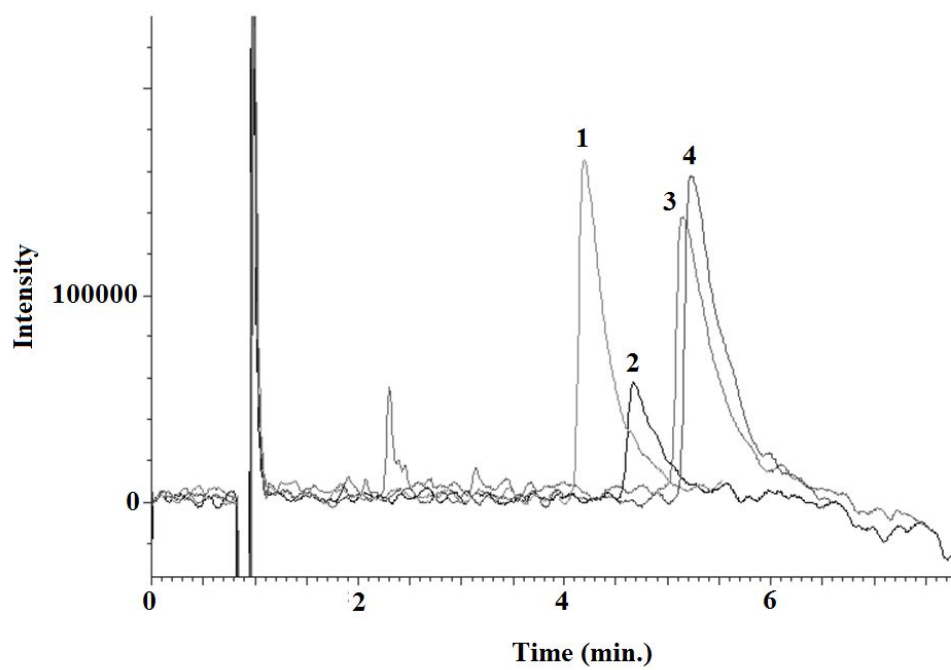

Figure 4S

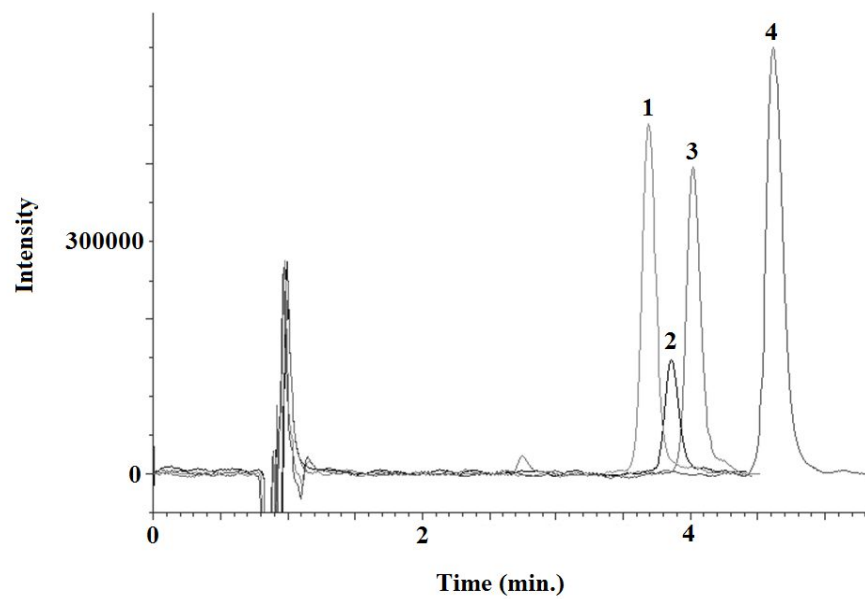

Figure 5S

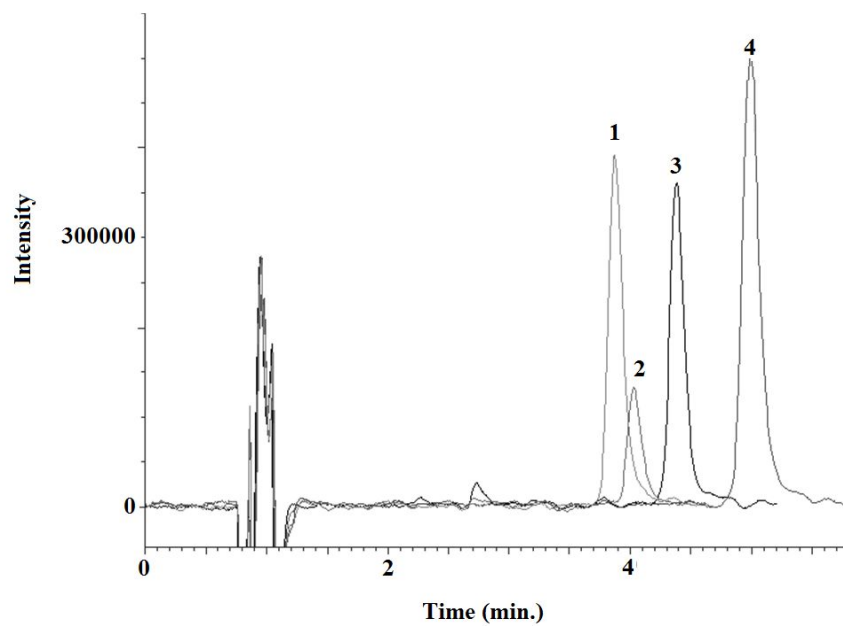

Figure 6S

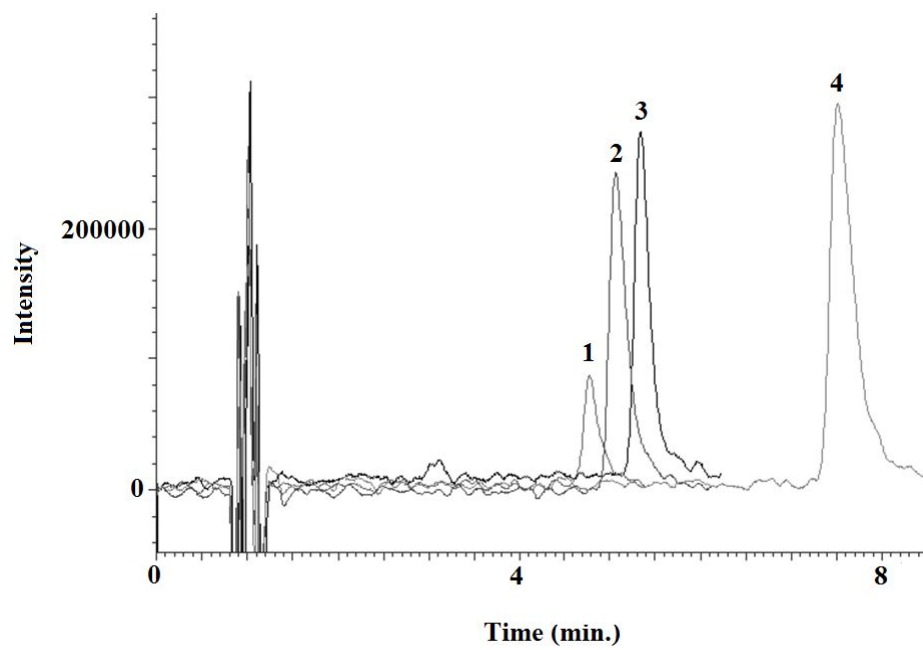

**Figure 7S**

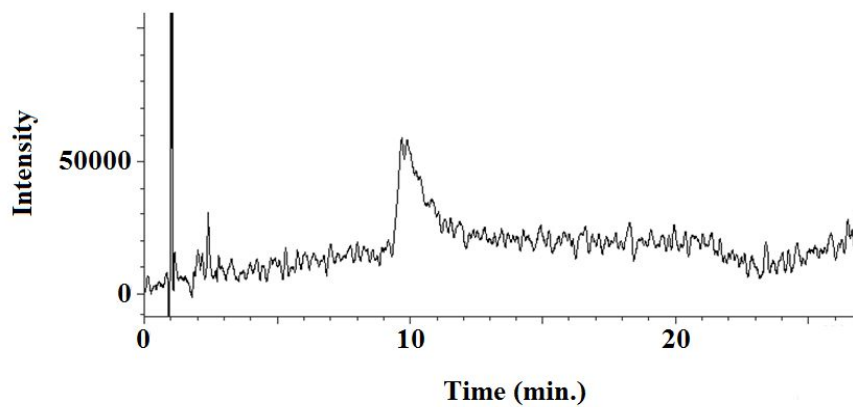



Figure 8S

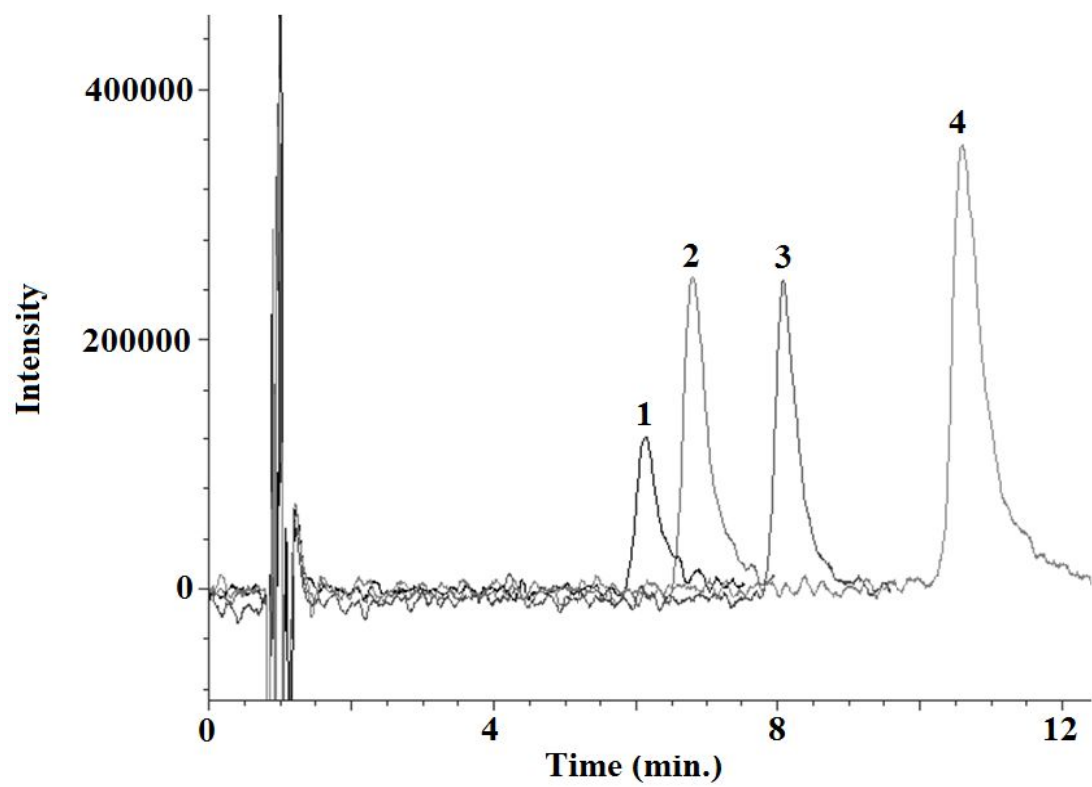

Figure 9S

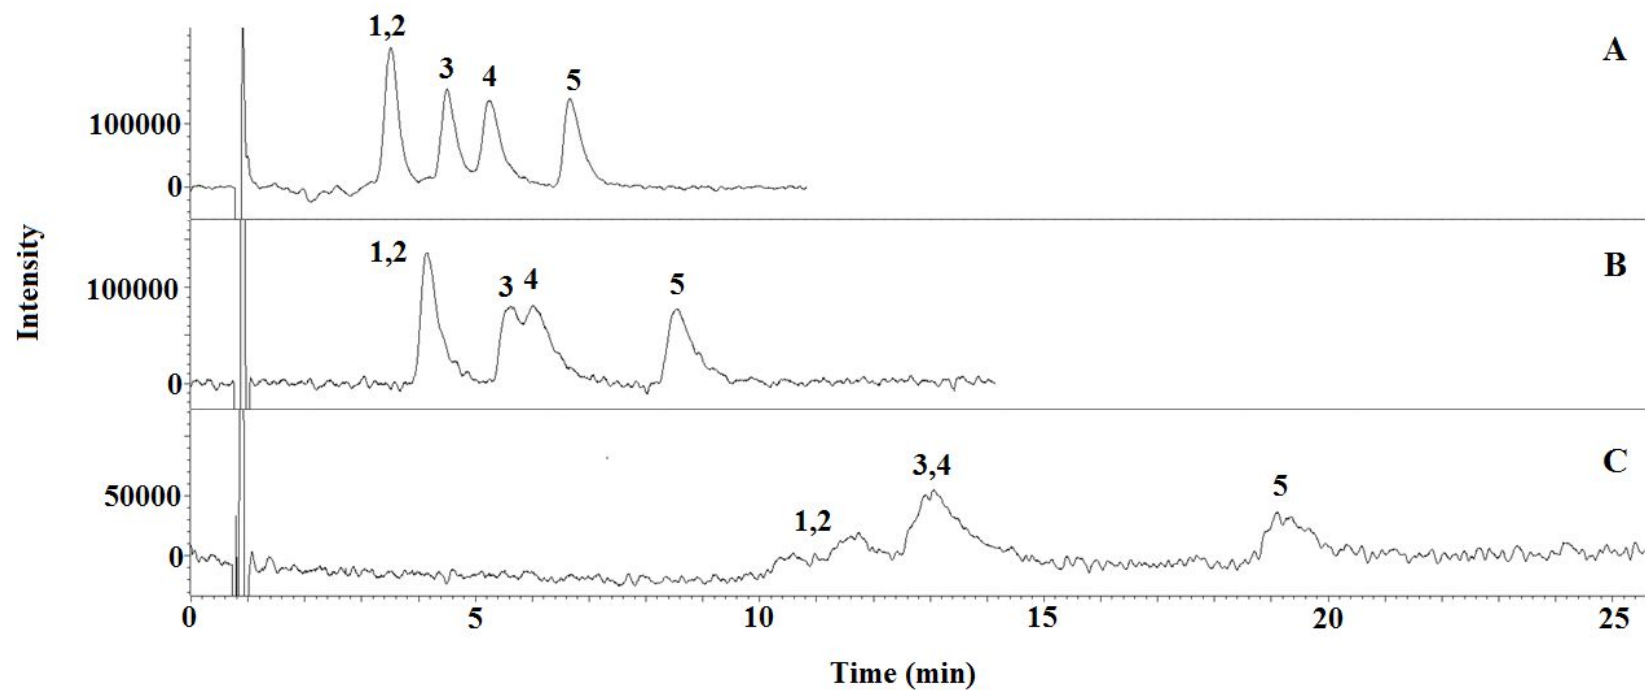

Figure 10S

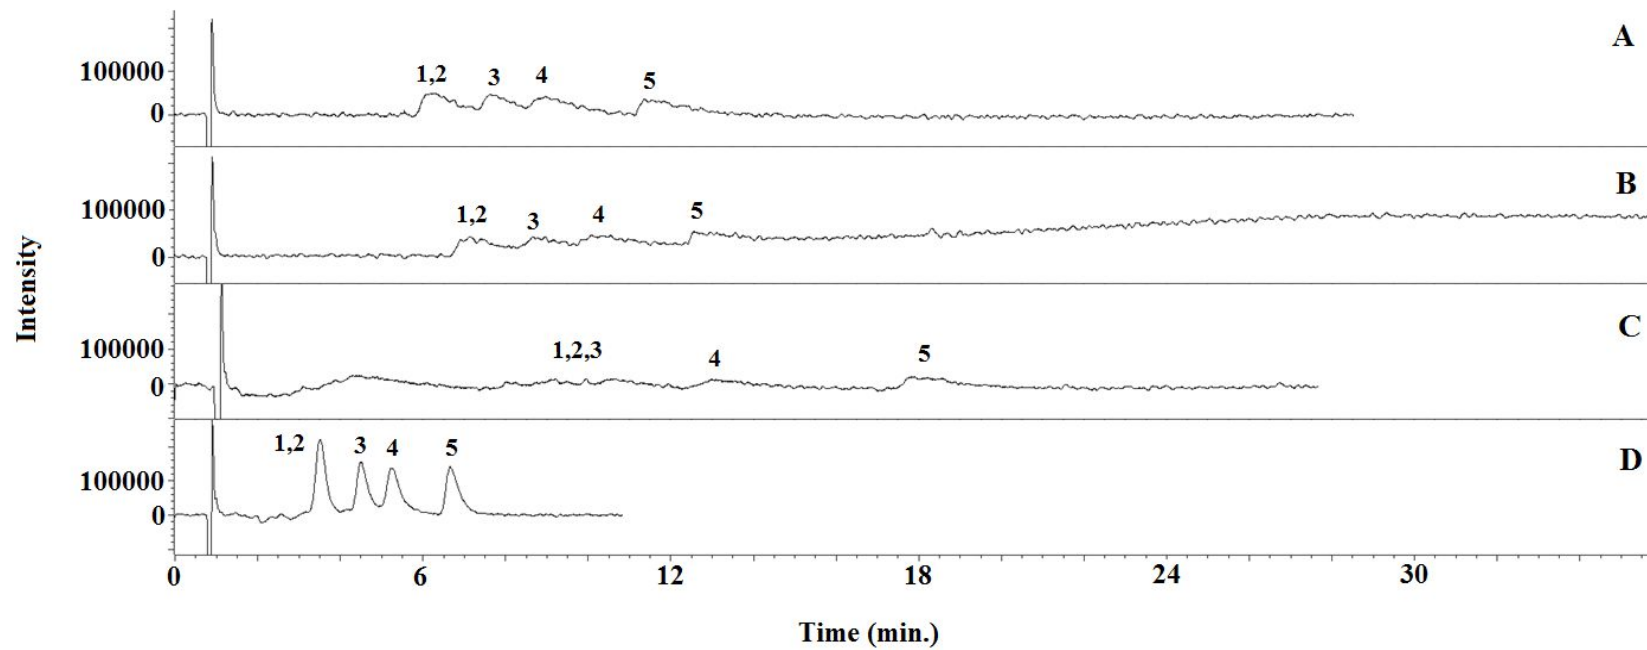

Figure 11S

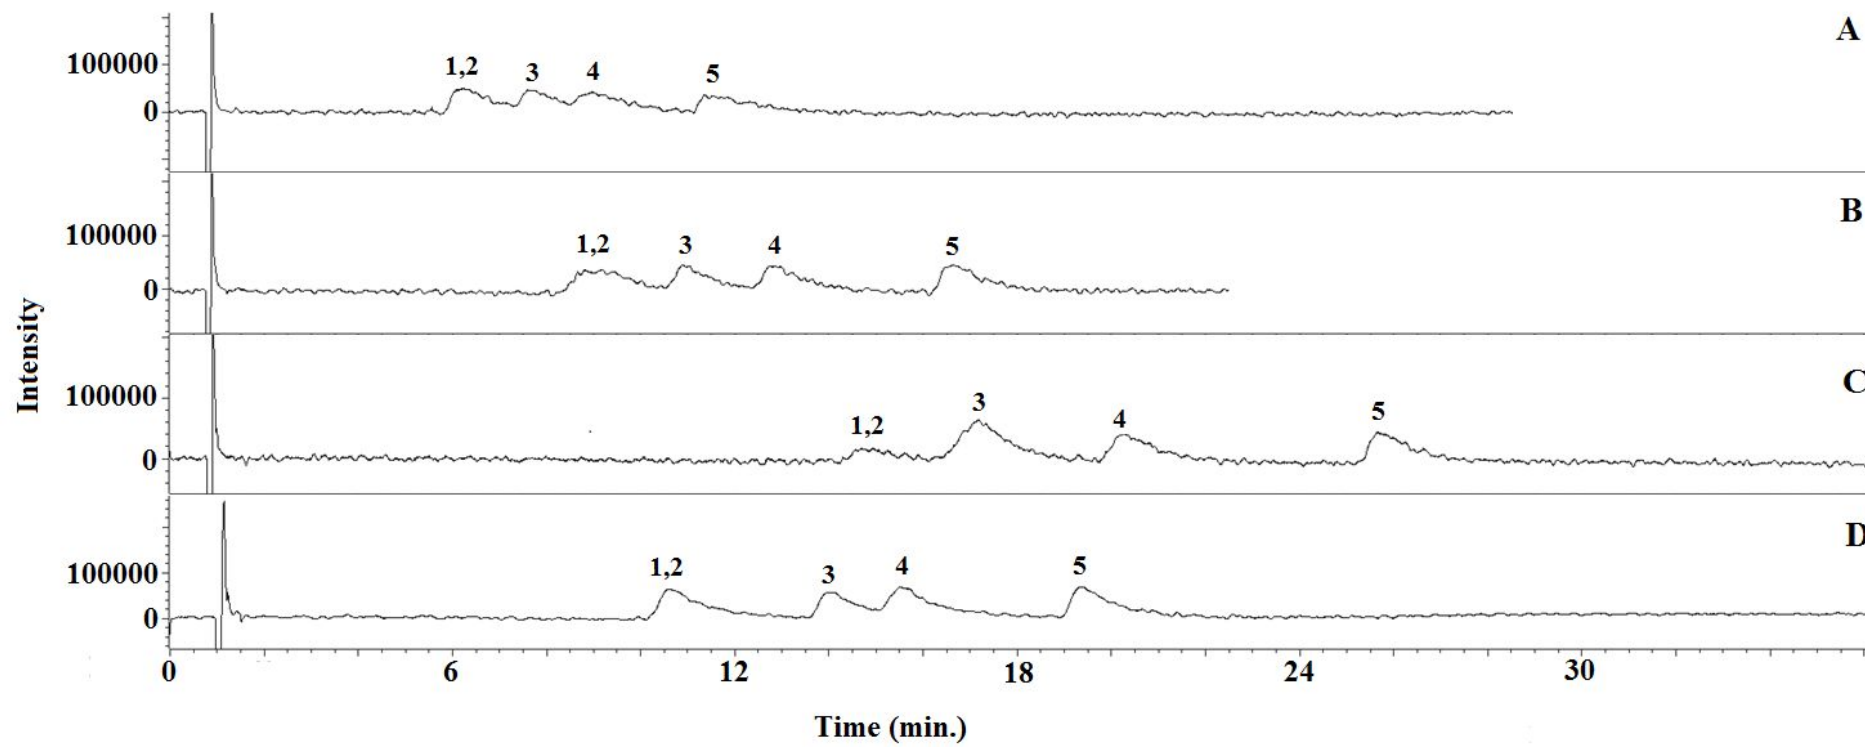

Supplement: jf2c07145_si_001.pdf [file jf2c07145_si_001.pdf]
